# Supplementary material for: Simultaneous LC-ESI-MS/MS Quantification of Levosimendan and Its Metabolites for Therapeutic Drug Monitoring of Cardiac Surgery Patients
Source: MDPI journal article supplement (doi:10.3390/pharmaceutics14071454), 2022-07-12
Supplement: s1 [file s1]

## **Supplemental Data**

### **Linearity of LC-MS/MS quantification for levosimendan and its metabolites**

Supplementary calibration data for Table 1a. The peak area ratios of levosimendan, OR-1855 and OR-1896 vs their internal standards were plotted against the concentrations of levosimendan, OR-1855 and OR-1896, respectively. Three calibration sets in triplicate were performed. Calibration covered a range from 0.15 nM to 500 nM (LLOQ: 0.15 nM, 0.45 nM, 1.5 nM, 5 nM, 50 nM, 250 nM and 500 nM), 0.5 nM to 1  $\mu$ M (LLOQ: 0.5 nM, 1.0 nM, 4.5 nM, 25 nM, 50 nM, 250 nM, 500 nM and 1000 nM) and 0.5 nM to 1  $\mu$ M (LLOQ: 0.5 nM, 1 nM, 4.5 nM, 25 nM, 50 nM, 250 nM, 500 nM and 1000 nM) for levosimendan, OR-1855 and OR-1896, respectively. Upon linear regression, the following mean calibration functions,  $y = 0.2184x + 0.5141$ ,  $y = 0.1299x + 0.2656$  and  $y = 0.2082x - 0.0624$  with  $r^2$  values of 0.9997, 0.9999 and 0.9995 for levosimendan, OR-1855 and OR-1896, respectively, were obtained. The calculated concentrations for all calibrators were between 85.8-115.0% (LLOQ 80.7-101.4%), 86.8-111.2% (LLOQ 80.8-96.6%) and 91.0-114.7% (LLOQ 81.6-101.4%) of nominal concentrations for levosimendan, OR-1855 and OR-1896, respectively. LC: Luna C8 (30 mm x 2 mm);  $\text{NH}_4\text{HCO}_3$  (5 mM; pH 8.5)/ $\text{CH}_3\text{CN}$  (76.6:23.4, v/v); 350  $\mu$ L/min. The internal  $^{13}\text{C}$  labelled standards were used in a fixed concentration of 5.0 nM in the final samples.

### **Linearity of LC-MS/MS LC-MS/MS quantification for levosimendan and its metabolites in combination with metamizole metabolites**

Supplementary calibration data for Table 2a. The peak area ratios of levosimendan, OR-1855, OR-1896, 4-AAP and 4-AAAP vs their internal standards were plotted against the concentrations of levosimendan, OR-1855, OR-1896, 4-AAP and 4-AAAP, respectively. Three calibration sets in triplicate were performed. Calibration covered a range from 0.45 nM to 500

nM (LLOQ: 0.45 nM, 1.35 nM, 5 nM, 50 nM, 150 nM, 250 nM, 350 nM and 500 nM), 1.5 nM to 500 nM (LLOQ: 1.5 nM, 4.5 nM, 25 nM, 50 nM, 150 nM, 250 nM, 350 nM and 500 nM), 1.5 nM to 500 nM (LLOQ: 1.5 nM, 4.5 nM, 25 nM, 50 nM, 150 nM, 250 nM, 350 nM and 500 nM), 50 nM to 5  $\mu$ M (LLOQ: 50 nM, 75 nM, 150 nM, 250 nM, 500 nM, 1000 nM and 5000 nM) and 1.35 nM to 5  $\mu$ M (LLOQ: 1.35 nM, 5.0 nM, 50 nM, 250 nM, 500 nM, 1000 nM and 5000 nM) for levosimendan, OR-1855, OR-1896, 4-AAP and 4-AAAP, respectively. Upon linear regression, the following mean calibration functions,  $y = 0.2486x + 0.8437$ ,  $y = 0.01874x - 0.020$ ,  $y = 0.0202x - 0.0188$ ,  $y = 0.0036x - 0.1429$  and  $y = 0.0711x - 0.420$  with  $r^2$  values of 0.9980, 0.9996, 0.9993, 0.9998 and 1.0 for levosimendan, OR-1855, OR-1896, 4-AAP and 4-AAAP respectively, were obtained. The calculated concentrations for all calibrators were in a range from 91.5-111.1% (LLOQ 92.0-97.8%), 94.2-106.2% (LLOQ 92.7-109.3%), and 88.4-107.6% (LLOQ 96.0-105.3%), 85.2-114.2% (LLOQ 90.0-110.2%) and 87.6-114.6% (LLOQ 91.1-111.0%) of nominal concentrations for levosimendan, OR-1855, OR-1896, 4-AAP and 4-AAAP, respectively. LC: Zorbax SB-C8 column (150 mm x 4.6 mm);  $\text{NH}_4\text{HCO}_3$  (5 mM; pH 8.5)/ $\text{CH}_3\text{CN}/\text{CH}_3\text{OH}$  (67:23:10, v/v); 750  $\mu\text{L}$  /min. The internal  $^{13}\text{C}$  labelled standards were added in a fixed concentration of 5.0 nM for levosimendan and 50.0 nM for OR-1855 and OR-1896.

**Table S1a)-c).** Source and compound specific parameters for LC-MS

Table 1a) Compound specific parameters

|                   |      |
|-------------------|------|
| levosimendan      | Volt |
| DP                | -120 |
| CE                | -28  |
| CXP               | -23  |
| OR-1855 & OR-1896 |      |
| DP                | 86   |
| CE                | 29   |
| CXP               | 14   |
| 4-AAP             |      |
| DP                | 61   |
| CE                | 53   |
| CXP               | 8    |
| 4-AAAP            |      |
| DP                | 61   |
| CE                | 19   |
| CXP               | 18   |

Table 1b) Source specific parameters for detection of levosimendan, OR-1855 and OR-1896

|                                  |        |
|----------------------------------|--------|
| temperature                      | 650 °C |
| ion spray voltage                | 1000 V |
| curtain gas (N <sub>2</sub> )    | 25 psi |
| auxillary gas (N <sub>2</sub> )  | 45 psi |
| nebulizing gas (N <sub>2</sub> ) | 35 psi |
| collision gas (N <sub>2</sub> )  | high   |

Table 1c) Source specific parameters for detection of levosimendan, OR-1855, OR-1896, 4-AAP and 4-AAAP

|                                  |        |
|----------------------------------|--------|
| temperature                      | 650 °C |
| ion spray voltage                | 1500 V |
| curtain gas (N <sub>2</sub> )    | 25 psi |
| auxillary gas (N <sub>2</sub> )  | 45 psi |
| nebulizing gas (N <sub>2</sub> ) | 35 psi |
| collision gas (N <sub>2</sub> )  | high   |

**Table S2.** Matrix effect of levosimendan, OR-1855 and OR-1896 as described in section 3.3.1 of the manuscript

| analyte          | concentration [nM] | matrix effect [%]   |
|------------------|--------------------|---------------------|
| levosimendan     | 1.0 nM             | 117.5               |
|                  |                    | 126.9               |
|                  |                    | 112.9               |
|                  |                    | 107.8               |
| mean ( $\pm$ SD) |                    | 116.3 ( $\pm$ 8.1)  |
| levosimendan     | 5.0 nM             | 115.3               |
|                  |                    | 119.4               |
|                  |                    | 103.8               |
|                  |                    | 96.6                |
| mean ( $\pm$ SD) |                    | 108.8 ( $\pm$ 10.5) |
| levosimendan     | 10.0 nM            | 127.7               |
|                  |                    | 134.7               |
|                  |                    | 104.9               |
|                  |                    | 102.1               |
| mean ( $\pm$ SD) |                    | 117.4 ( $\pm$ 16.3) |
| OR-1855          | 1.0 nM             | 63.8                |
|                  |                    | 62.8                |
|                  |                    | 77.2                |
|                  |                    | 66.4                |
| mean ( $\pm$ SD) |                    | 67.6 ( $\pm$ 6.6)   |
| OR-1855          | 5.0 nM             | 59.6                |
|                  |                    | 62.8                |
|                  |                    | 63.0                |
|                  |                    | 63.4                |
| mean ( $\pm$ SD) |                    | 62.2 ( $\pm$ 1.8)   |
| OR-1855          | 10.0 nM            | 59.8                |
|                  |                    | 68.1                |
|                  |                    | 72.8                |
|                  |                    | 68.8                |
| mean ( $\pm$ SD) |                    | 67.4 ( $\pm$ 5.5)   |
| OR-1896          | 1.0 nM             | 87.1                |
|                  |                    | 82.9                |
|                  |                    | 84.4                |
|                  |                    | 70.1                |
| mean ( $\pm$ SD) |                    | 81.1 ( $\pm$ 7.6)   |
| OR-1896          | 5.0 nM             | 87.5                |
|                  |                    | 83.5                |
|                  |                    | 79.4                |
|                  |                    | 75.6                |
| mean ( $\pm$ SD) |                    | 81.5 ( $\pm$ 5.1)   |
| OR-1896          | 10.0 nM            | 74.0                |
|                  |                    | 69.6                |
|                  |                    | 80.3                |
|                  |                    | 75.4                |
| mean ( $\pm$ SD) |                    | 74.8 ( $\pm$ 4.4)   |

**Table S3.** Bench top stability of levosimendan described in section 3.3.5 of the manuscript

| levosimendan       | Area Ratio<br>Analyte vs. int.<br>standard | Area Ratio of t <sub>0h</sub><br>vs. Area Ratio t <sub>6h</sub> |
|--------------------|--------------------------------------------|-----------------------------------------------------------------|
| 450 pM at RT       | 1.19E-01                                   | 99.2 %                                                          |
| 450 pM 6h at RT    | 1.18E-01                                   |                                                                 |
| 450 pM on Ice      | 1.21E-01                                   | 93.4%                                                           |
| 450 pM 6h on Ice   | 1.13E-01                                   |                                                                 |
| 1.35 nM at RT      | 3.58E-01                                   | 92.2%                                                           |
| 1.35 nM 6h at RT   | 3.30E-01                                   |                                                                 |
| 1.35 nM on Ice     | 4.78E-01                                   | 100.6%                                                          |
| 1.35 nM 6h on Ice  | 4.81E-01                                   |                                                                 |
| 4.5 nM at RT       | 1.33E+00                                   | 98.5%                                                           |
| 4.5 nM 6h at RT    | 1.31E+00                                   |                                                                 |
| 4.5 nM on Ice      | 1.29E+00                                   | 96.1%                                                           |
| 4.5 nM 6h on Ice   | 1.24E+00                                   |                                                                 |
| 50.0 nM at RT      | 1.47E+01                                   | 87.1%                                                           |
| 50.0 nM 6h at RT   | 1.28E+01                                   |                                                                 |
| 50.0 nM on Ice     | 1.35E+01                                   | 103.7%                                                          |
| 50.0 nM 6h on Ice  | 1.40E+01                                   |                                                                 |
| 500.0 nM at RT     | 1.11E+02                                   | 91.9%                                                           |
| 500.0 nM 6h at RT  | 1.02E+02                                   |                                                                 |
| 500.0 nM on Ice    | 1.03E+02                                   | 99.0%                                                           |
| 500.0 nM 6h on Ice | 1.02E+02                                   |                                                                 |

**Table S4.** Bench top stability of OR-1855 described in section 3.3.5 of the manuscript

| OR-1855            | Area Ratio<br>Analyte vs. int.<br>standard | Area Ratio of t <sub>0h</sub><br>vs. Area Ratio t <sub>6h</sub> |
|--------------------|--------------------------------------------|-----------------------------------------------------------------|
| 1.5 nM at RT       | 2.67E-01                                   | 98.1 %                                                          |
| 1.5 nM 6h at RT    | 2.62E-01                                   |                                                                 |
| 1.5 nM on Ice      | 2.70E-01                                   | 92.6%                                                           |
| 1.5 nM 6h on Ice   | 2.50E-01                                   |                                                                 |
| 4.5 nM at RT       | 7.15E-01                                   | 105.2%                                                          |
| 4.5 nM 6h at RT    | 7.52E-01                                   |                                                                 |
| 4.5 nM on Ice      | 7.01E-01                                   | 99.9%                                                           |
| 4.5 nM 6h on Ice   | 7.00E-01                                   |                                                                 |
| 13.5 nM at RT      | 5.30E+00                                   | 96.2%                                                           |
| 13.5 nM 6h at RT   | 5.10E+00                                   |                                                                 |
| 13.5 nM on Ice     | 2.50E+00                                   | 102.8%                                                          |
| 13.5 nM 6h on Ice  | 2.57E+00                                   |                                                                 |
| 50.0 nM at RT      | 8.52E+00                                   | 96.5%                                                           |
| 50.0 nM 6h at RT   | 8.22E+00                                   |                                                                 |
| 50.0 nM on Ice     | 9.41E+00                                   | 91.0%                                                           |
| 50.0 nM 6h on Ice  | 8.56E+00                                   |                                                                 |
| 500.0 nM at RT     | 7.69E+01                                   | 104.8%                                                          |
| 500.0 nM 6h at RT  | 8.06E+01                                   |                                                                 |
| 500.0 nM on Ice    | 7.81E+01                                   | 99.7%                                                           |
| 500.0 nM 6h on Ice | 7.79E+01                                   |                                                                 |

**Table S5.** Bench top stability of OR-1896 described in section 3.3.5 of the manuscript

| OR-1896            | Area Ratio<br>Analyte vs. int.<br>standard | Area Ratio of $t_{0h}$<br>vs. Area Ratio $t_{6h}$ |
|--------------------|--------------------------------------------|---------------------------------------------------|
| 1.5 nM at RT       | 2.52E-01                                   | 100.8%                                            |
| 1.5 nM 6h at RT    | 2.50E-01                                   |                                                   |
| 1.5 nM on Ice      | 2.24E-01                                   | 101.4%                                            |
| 1.5 nM 6h on Ice   | 2.17E-01                                   |                                                   |
| 4.5 nM at RT       | 7.43E-01                                   | 99.5%                                             |
| 4.5 nM 6h at RT    | 7.47E-01                                   |                                                   |
| 4.5 nM on Ice      | 8.15E-01                                   | 97.8%                                             |
| 4.5 nM 6h on Ice   | 8.33E-01                                   |                                                   |
| 13.5 nM at RT      | 3.46E+00                                   | 94.5%                                             |
| 13.5 nM 6h at RT   | 3.66E+00                                   |                                                   |
| 13.5 nM on Ice     | 1.93E+00                                   | 95.5%                                             |
| 13.5 nM 6h on Ice  | 2.02E+00                                   |                                                   |
| 50.0 nM at RT      | 8.44E+00                                   | 100.8%                                            |
| 50.0 nM 6h at RT   | 8.37E+00                                   |                                                   |
| 50.0 nM on Ice     | 8.09E+00                                   | 97.1%                                             |
| 50.0 nM 6h on Ice  | 8.33E+00                                   |                                                   |
| 500.0 nM at RT     | 7.30E+01                                   | 92.5%                                             |
| 500.0 nM 6h at RT  | 7.89E+01                                   |                                                   |
| 500.0 nM on Ice    | 7.09E+01                                   | 101.1%                                            |
| 500.0 nM 6h on Ice | 6.92E+01                                   |                                                   |

**Table S6.** Extraction efficiency of 4-AAP and 4-AAAP as described in section 3.6 of the manuscript

| 4-AAP                   | 75 nM             | 150 nM            | 350 nM            | 750 nM            |
|-------------------------|-------------------|-------------------|-------------------|-------------------|
| extraction recovery [%] | 61.2              | 69.9              | 70.1              | 62.5              |
|                         | 56.9              | 78.3              | 54.1              | 62.5              |
|                         | 61.2              | 73.2              | 60.7              | 55.6              |
| mean [%] ( $\pm$ SD)    | 59.8 ( $\pm$ 2.5) | 73.8 ( $\pm$ 4.2) | 61.6 ( $\pm$ 8.0) | 60.2 ( $\pm$ 4.0) |
| 4-AAAP                  | 1.35 nM           | 4.05 nM           | 75 nM             | 500 nM            |
| extraction recovery [%] | 10.3              | 13.6              | 10.2              | 9.3               |
|                         | 10.1              | 14.2              | 12.0              | 9.2               |
|                         | 8.5               | 12.6              | 9.1               | 10.6              |
| mean [%] ( $\pm$ SD)    | 9.6 ( $\pm$ 1.0)  | 13.5 ( $\pm$ 0.8) | 10.4 ( $\pm$ 1.5) | 9.7 ( $\pm$ 0.8)  |



**Table S7.** Matrix effect of 4-AAP and 4-AAAP as described in section 3.7.1 of the manuscript

| analyte            | concentration [nM] | matrix effect [%] |
|--------------------|--------------------|-------------------|
| 4-AAP              | 150.0 nM           | 79.3              |
|                    |                    | 89.8              |
|                    |                    | 84.1              |
|                    |                    | 81.3              |
| mean (( $\pm$ SD)) |                    | 83.6 ( $\pm$ 4.6) |
| 4-AAP              | 350.0 nM           | 90.4              |
|                    |                    | 88.0              |
|                    |                    | 89.6              |
|                    |                    | 80.8              |
| mean ( $\pm$ SD)   |                    | 87.2 ( $\pm$ 4.4) |
| 4-AAP              | 750.0 nM           | 85.1              |
|                    |                    | 84.2              |
|                    |                    | 85.6              |
|                    |                    | 81.6              |
| mean ( $\pm$ SD)   |                    | 84.1 ( $\pm$ 1.8) |
| 4-AAAP             | 4.05 nM            | 97.4              |
|                    |                    | 97.0              |
|                    |                    | 102.3             |
|                    |                    | 98.1              |
| mean ( $\pm$ SD)   |                    | 98.7 ( $\pm$ 2.4) |
| 4-AAAP             | 75.0 nM            | 100.2             |
|                    |                    | 98.9              |
|                    |                    | 99.8              |
|                    |                    | 93.6              |
| mean ( $\pm$ SD)   |                    | 98.1 ( $\pm$ 3.1) |
| 4-AAAP             | 500.0 nM           | 97.6              |
|                    |                    | 93.0              |
|                    |                    | 91.1              |
|                    |                    | 99.7              |
| mean ( $\pm$ SD)   |                    | 95.4 ( $\pm$ 4.0) |

**Table S8.** Matrix effect of levosimendan, OR-1855 and OR-1896 as described in section 3.7.1 of the manuscript

| analyte          | concentration [nM] | matrix effect [%]  |
|------------------|--------------------|--------------------|
| levosimendan     | 1.35 nM            | 99.8               |
|                  |                    | 113.2              |
|                  |                    | 98.1               |
|                  |                    | 110.7              |
| mean ( $\pm$ SD) |                    | 105.5 ( $\pm$ 7.6) |
| levosimendan     | 75.0 nM            | 107.9              |
|                  |                    | 108.9              |
|                  |                    | 102.3              |
|                  |                    | 105.7              |
| mean ( $\pm$ SD) |                    | 106.2 ( $\pm$ 2.9) |
| levosimendan     | 300.0 nM           | 118.7              |
|                  |                    | 117.7              |
|                  |                    | 117.5              |
|                  |                    | 114.3              |
| mean ( $\pm$ SD) |                    | 117.1 ( $\pm$ 1.9) |
| OR-1855          | 4.5 nM             | 71.2               |
|                  |                    | 78.8               |
|                  |                    | 74.8               |
|                  |                    | 71.3               |
| mean ( $\pm$ SD) |                    | 74.0 ( $\pm$ 3.6)  |
| OR-1855          | 75.0 nM            | 68.1               |
|                  |                    | 69.6               |
|                  |                    | 79.1               |
|                  |                    | 65.8               |
| mean ( $\pm$ SD) |                    | 70.7 ( $\pm$ 5.9)  |
| OR-1855          | 300.0 nM           | 72.9               |
|                  |                    | 74.3               |
|                  |                    | 77.6               |
|                  |                    | 82.7               |
| mean ( $\pm$ SD) |                    | 76.9 ( $\pm$ 4.4)  |
| OR-1896          | 4.5 nM             | 87.3               |
|                  |                    | 92.7               |
|                  |                    | 82.1               |
|                  |                    | 84.6               |
| mean ( $\pm$ SD) |                    | 86.7 ( $\pm$ 4.5)  |
| OR-1896          | 75.0 nM            | 98.2               |
|                  |                    | 98.4               |
|                  |                    | 94.1               |
|                  |                    | 92.5               |
| mean ( $\pm$ SD) |                    | 95.8 ( $\pm$ 3.0)  |
| OR-1896          | 300.0 nM           | 83.3               |
|                  |                    | 80.1               |
|                  |                    | 78.0               |
|                  |                    | 82.6               |
| mean ( $\pm$ SD) |                    | 81.0 ( $\pm$ 2.4)  |
